# Supplementary material for: The SIAH2-NRF1 axis spatially regulates tumor microenvironment remodeling for tumor progression
Source: PubMed Central journal article supplement (PMC6399320; doi:10.1038/s41467-019-08618-y), 2019-03-04
Supplement: 41467_2019_8618_MOESM1_ESM.pdf [file 41467_2019_8618_MOESM1_ESM.pdf]

## **Supplementary Information**

The SIAH2-NRF1 axis spatially regulates tumor  
microenvironment remodeling for tumor progression

Ma et al.

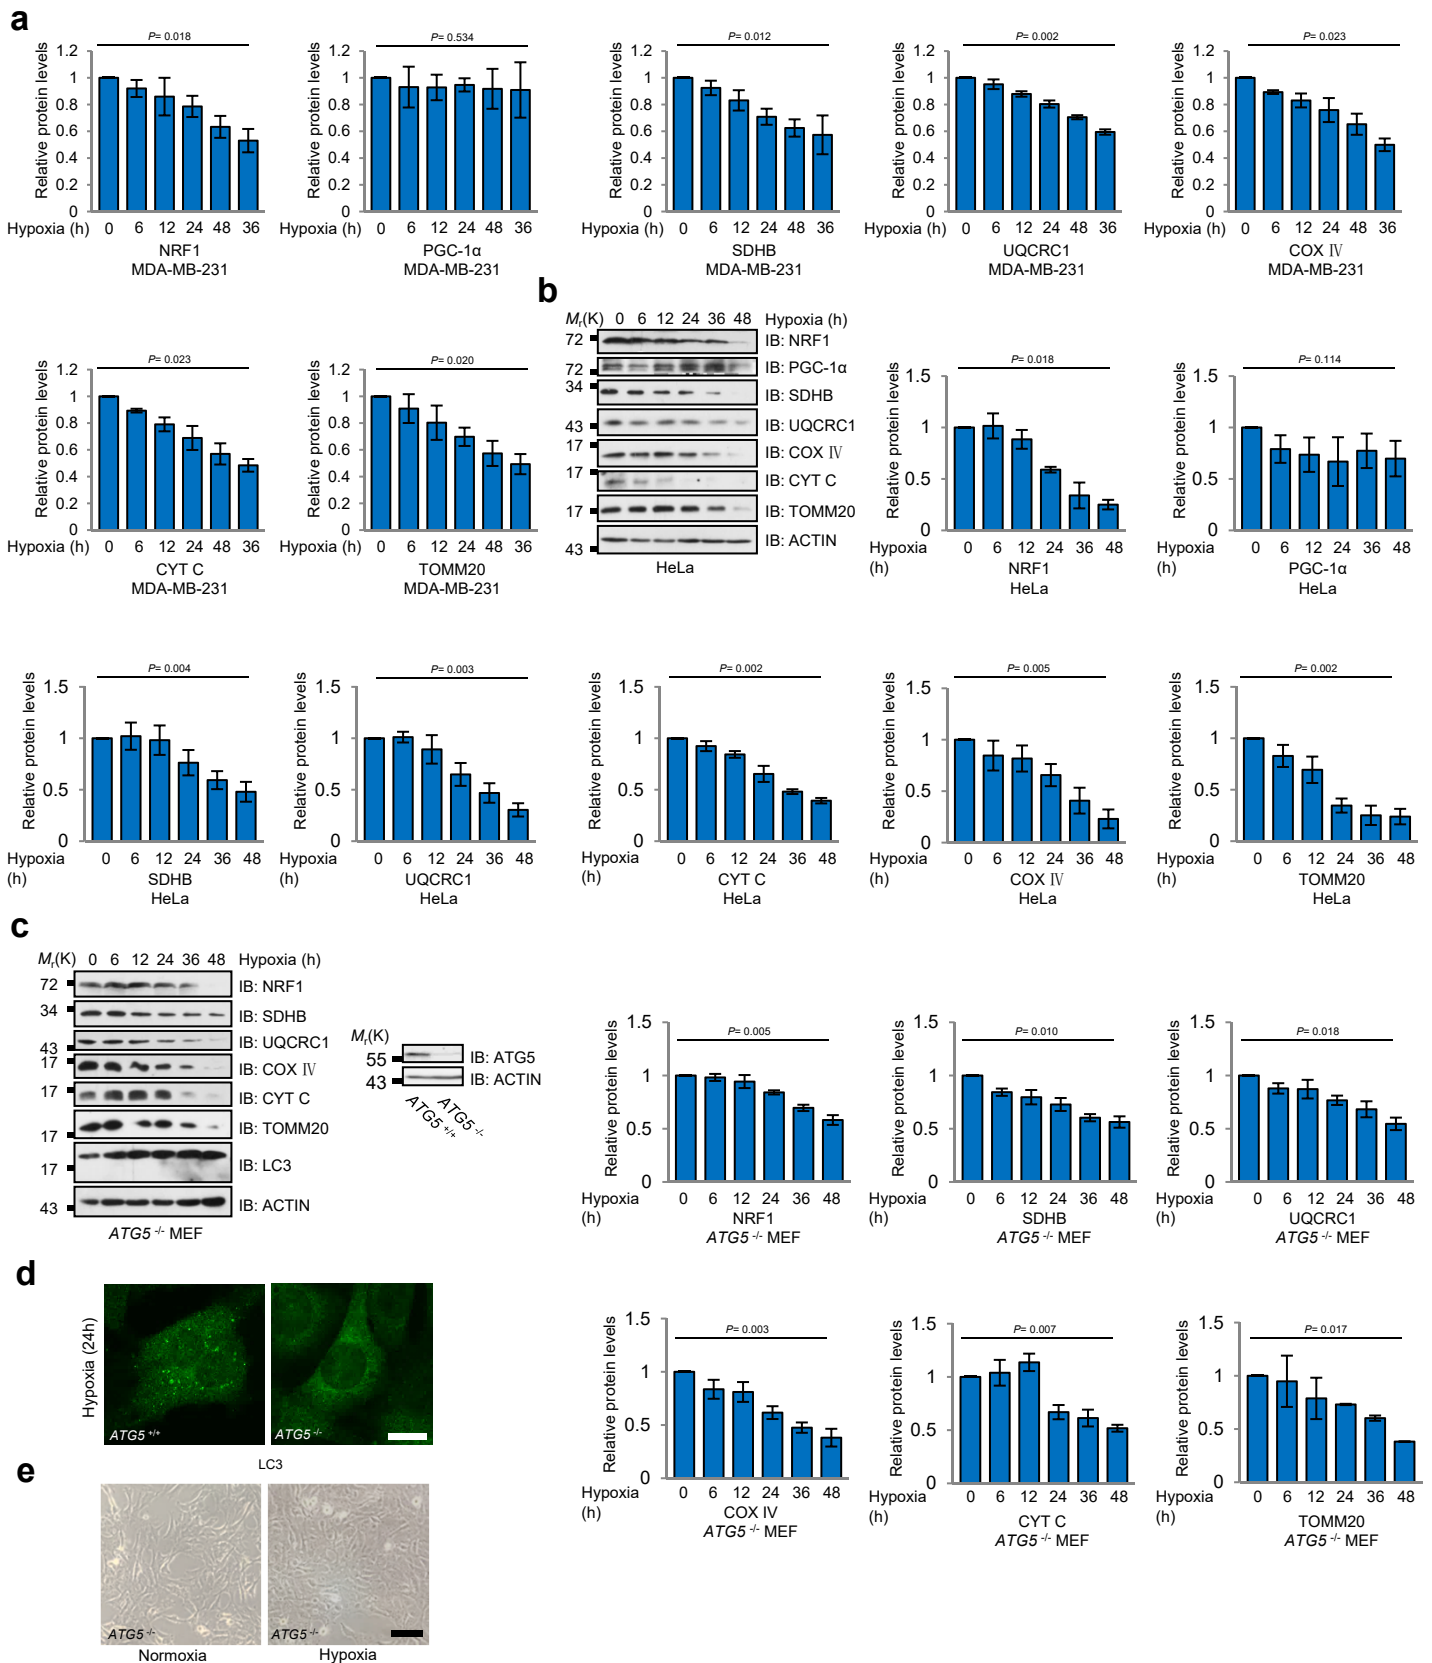

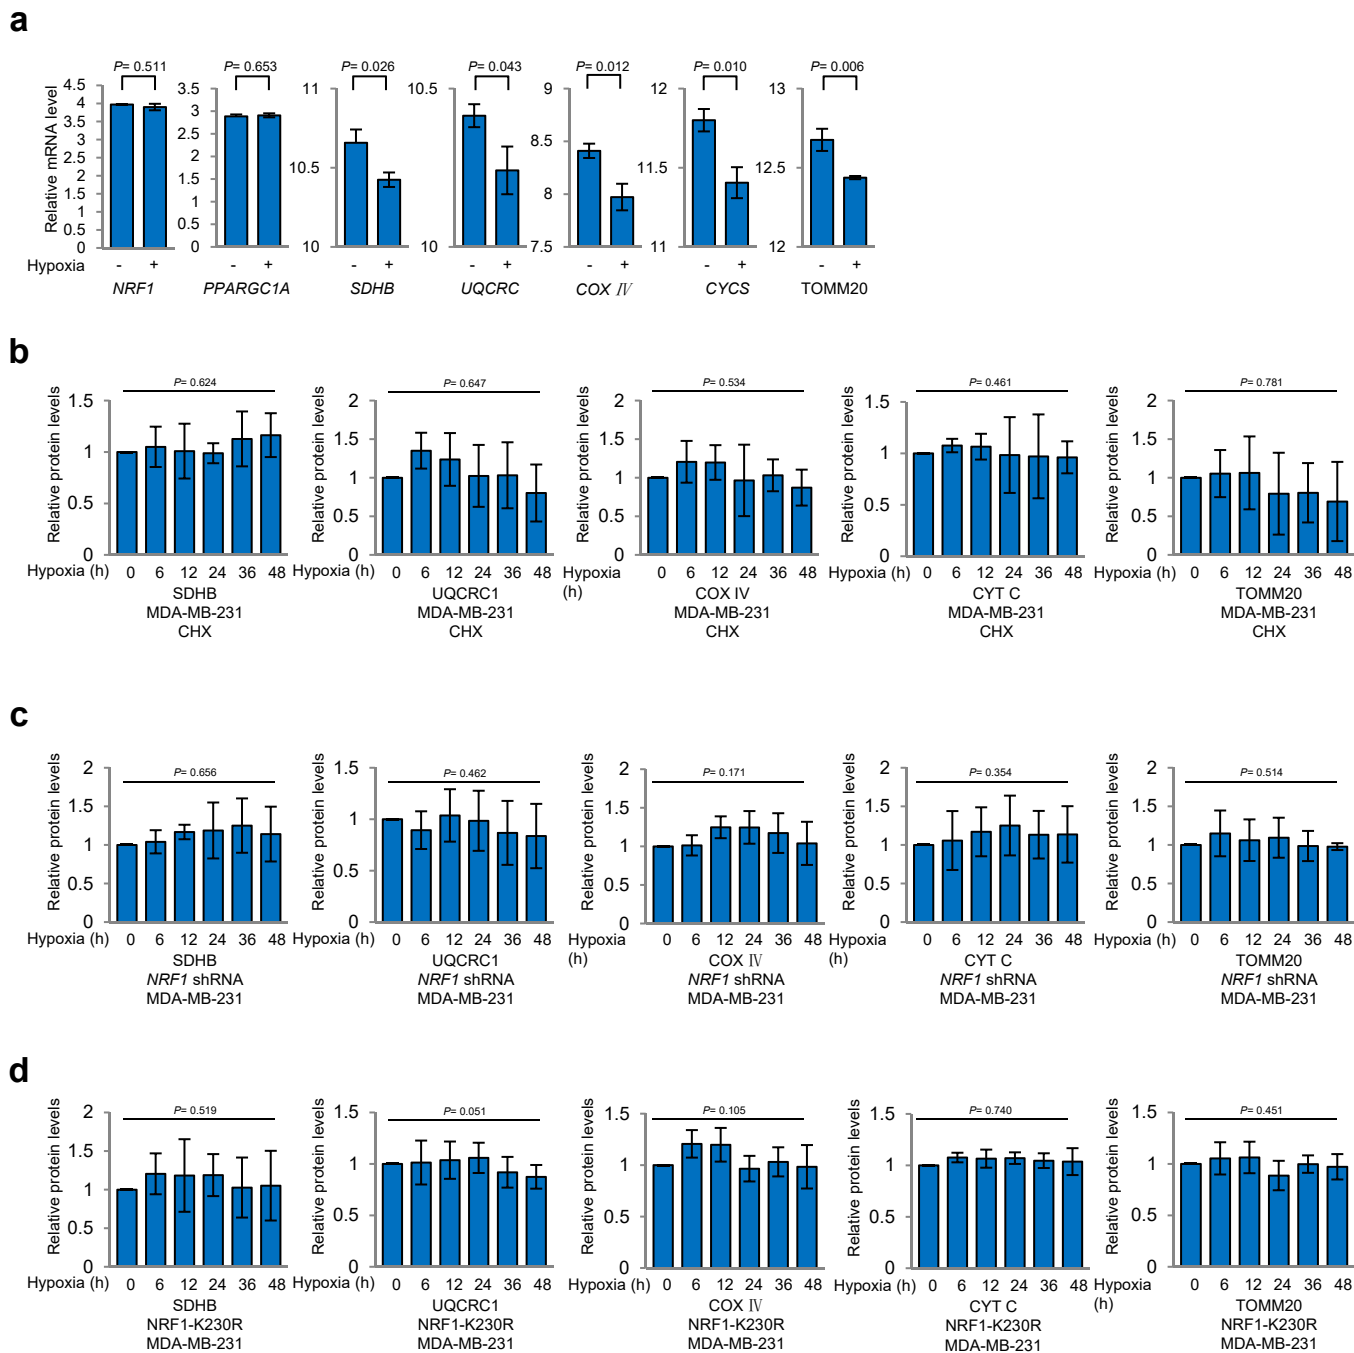

**Supplementary Figure 2** Hypoxia inhibits nuclear-encoded mitochondrial gene expression through NRF1. **(a)** Statistical analysis of the expression levels of the indicated genes in dataset GSE18494. **(b)** Statistical analysis of data from Figure 2c. **(c)** Statistical analysis of data from Figure 2d. **(d)** Statistical analysis of data from Figure 5e. For all panels, error bars indicate s.d., n = 3 biological replicates, average of n=3 technical replicates for each biological replicate was used. One-way ANOVA was used to compare data.

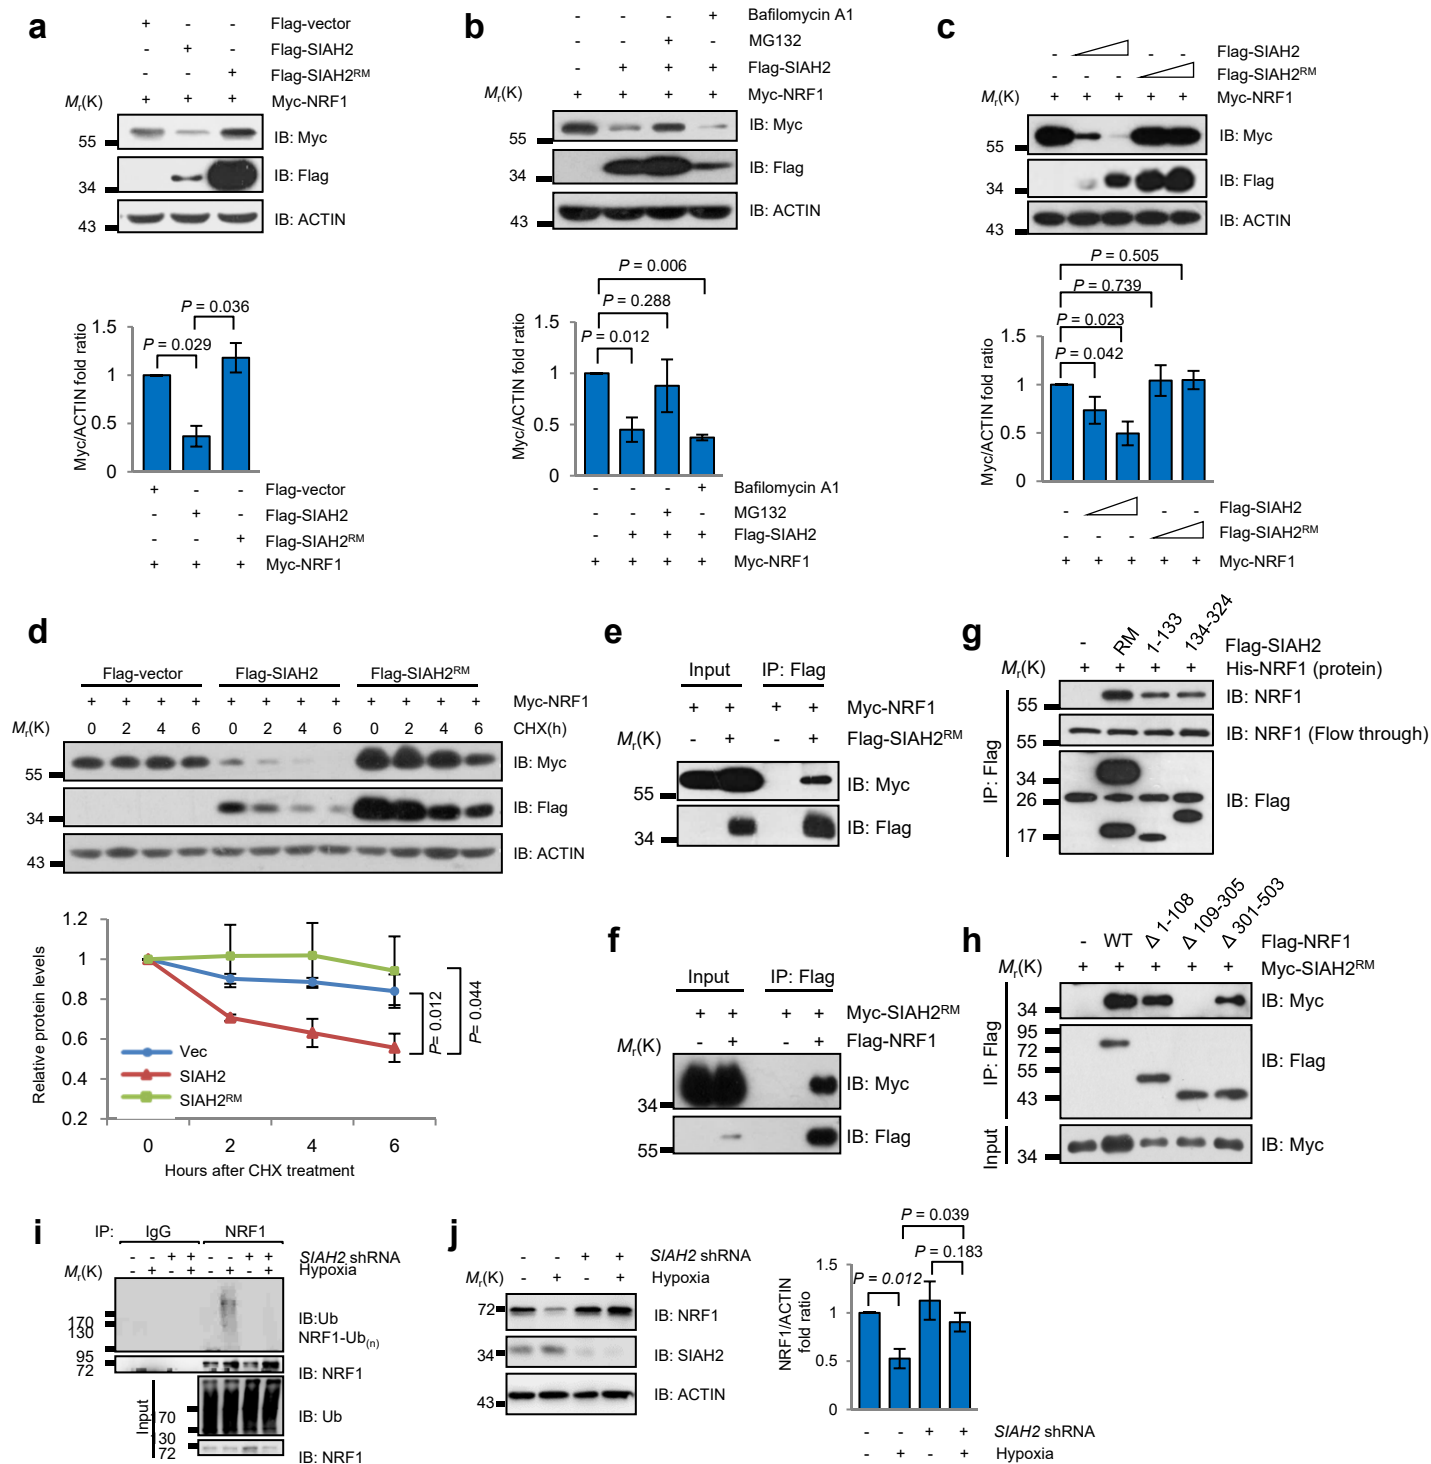

**Supplementary Figure 3** SIAH2 interacts with NRF1 and negatively regulates its stability through ubiquitination. **(a)** HeLa cells transiently expressing SIAH2 or SIAH2<sup>RM</sup> (Ref. 34) (a dominant-negative mutant which lacks ubiquitin E3 ligase activity but retains the ability to bind to its substrate) together with NRF1 were collected for immunoblotting with the indicated antibodies. Quantification of NRF1 protein levels is shown below. **(b)** HeLa cells transiently expressing SIAH2 or SIAH2<sup>RM</sup> together with NRF1 for 24 h were treated with 10  $\mu$ M proteasomal inhibitor MG132 or 100 nM autophagy inhibitor Bafilomycin A1 (BafA1) for an additional 6 h. Cells were collected for immunoblotting with the indicated antibodies. Quantification of NRF1 protein levels is shown below. **(c)** NRF1 degradation depends on the dosage of SIAH2, but is unaffected by SIAH2<sup>RM</sup>. Quantification of NRF1 protein levels is shown below. **(d)** The half-life of NRF1 is shortened by SIAH2, but not by SIAH2<sup>RM</sup> in cycloheximide chase assays. Quantification of NRF1 protein levels is shown below. **(e, f)** Co-immunoprecipitations of exogenously expressed Myc-NRF1 with Flag-SIAH2<sup>RM</sup> **(e)** and vice versa **(f)** in HEK293T cells. **(g)** Co-immunoprecipitations of exogenously expressed Myc-NRF1 with the N- or C-terminal half of Flag-SIAH2. **(h)** Dissection of the critical regions of NRF1 for SIAH2 binding through co-immunoprecipitation in HEK293T cells. **(i)** Decreased hypoxia-induced NRF1 ubiquitination by knockdown of SIAH2. **(j)** Scramble and SIAH2-knockdown MDA-MB-231 cells were cultured under normoxia or hypoxia for 36 h, and then were collected for analysis using the indicated antibodies. Quantification of NRF1 protein levels is shown on the right. For all panels, error bars indicate s.d.. For panel (a-d) and (j), n = 3 biological replicates. The two-tailed paired ratio t-test was used to compare data.

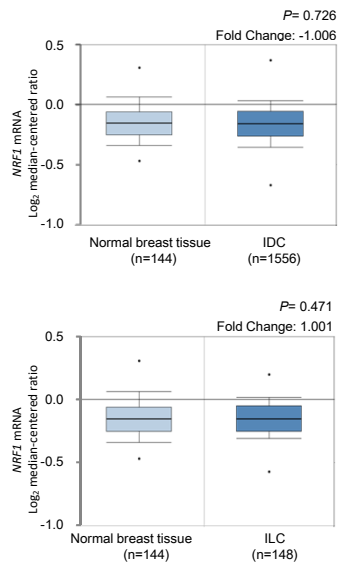

**Supplementary Figure 4** Transcriptional analysis of NRF1 in breast cancer patients with invasive ductal carcinoma (IDC) or invasive lobular carcinoma (ILC) based on OncoPrint.

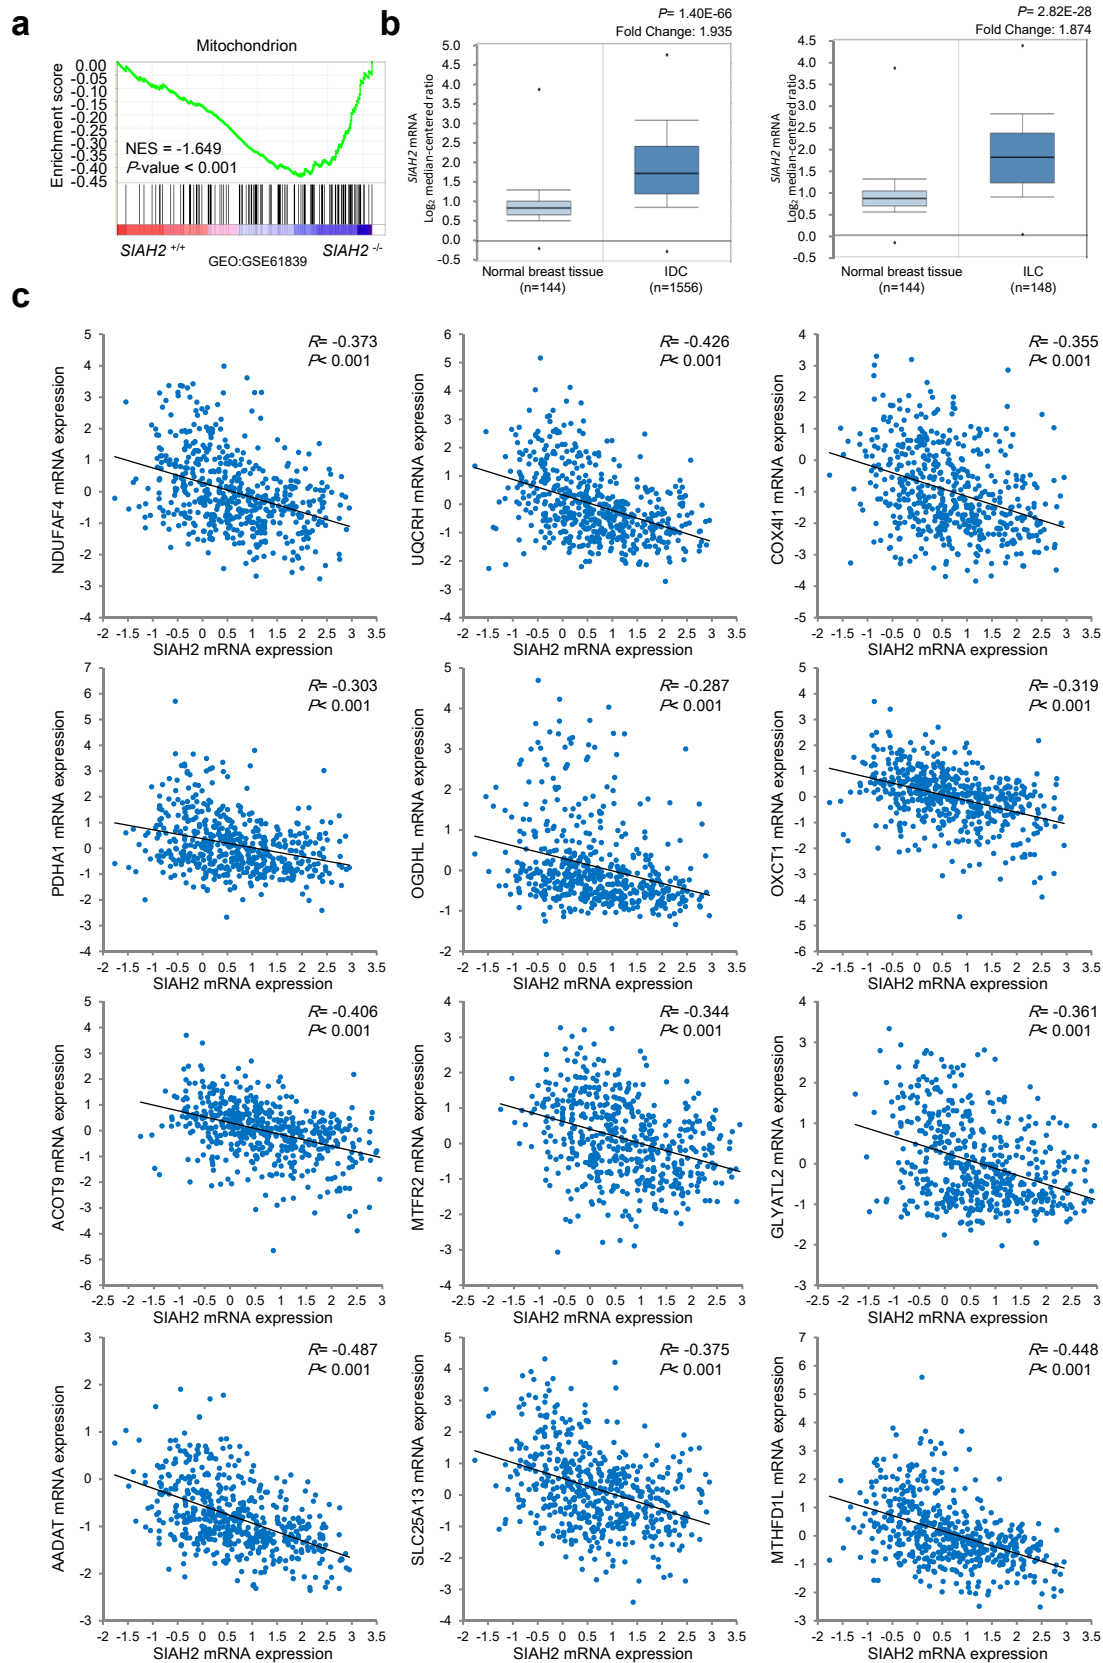

**Supplementary Figure 5** SIAH2 negatively correlates with mitochondrial genes expression. **(a)** GO enrichment in mitochondrial genes in SIAH2<sup>-/-</sup> mouse tissues from dataset GSE61839, with a FDR of < 25%. **(b)** Transcriptional analysis of SIAH2 in breast cancer patients with invasive ductal carcinoma (IDC) or invasive lobular carcinoma (ILC) based on Oncomine. **(c)** Analysis of the correlations between the transcriptional levels of SIAH2 and multiple nuclear-encoded mitochondrial genes in breast cancer patients based on the Cancer Genome Atlas (TCGA) database using cBioPortal.

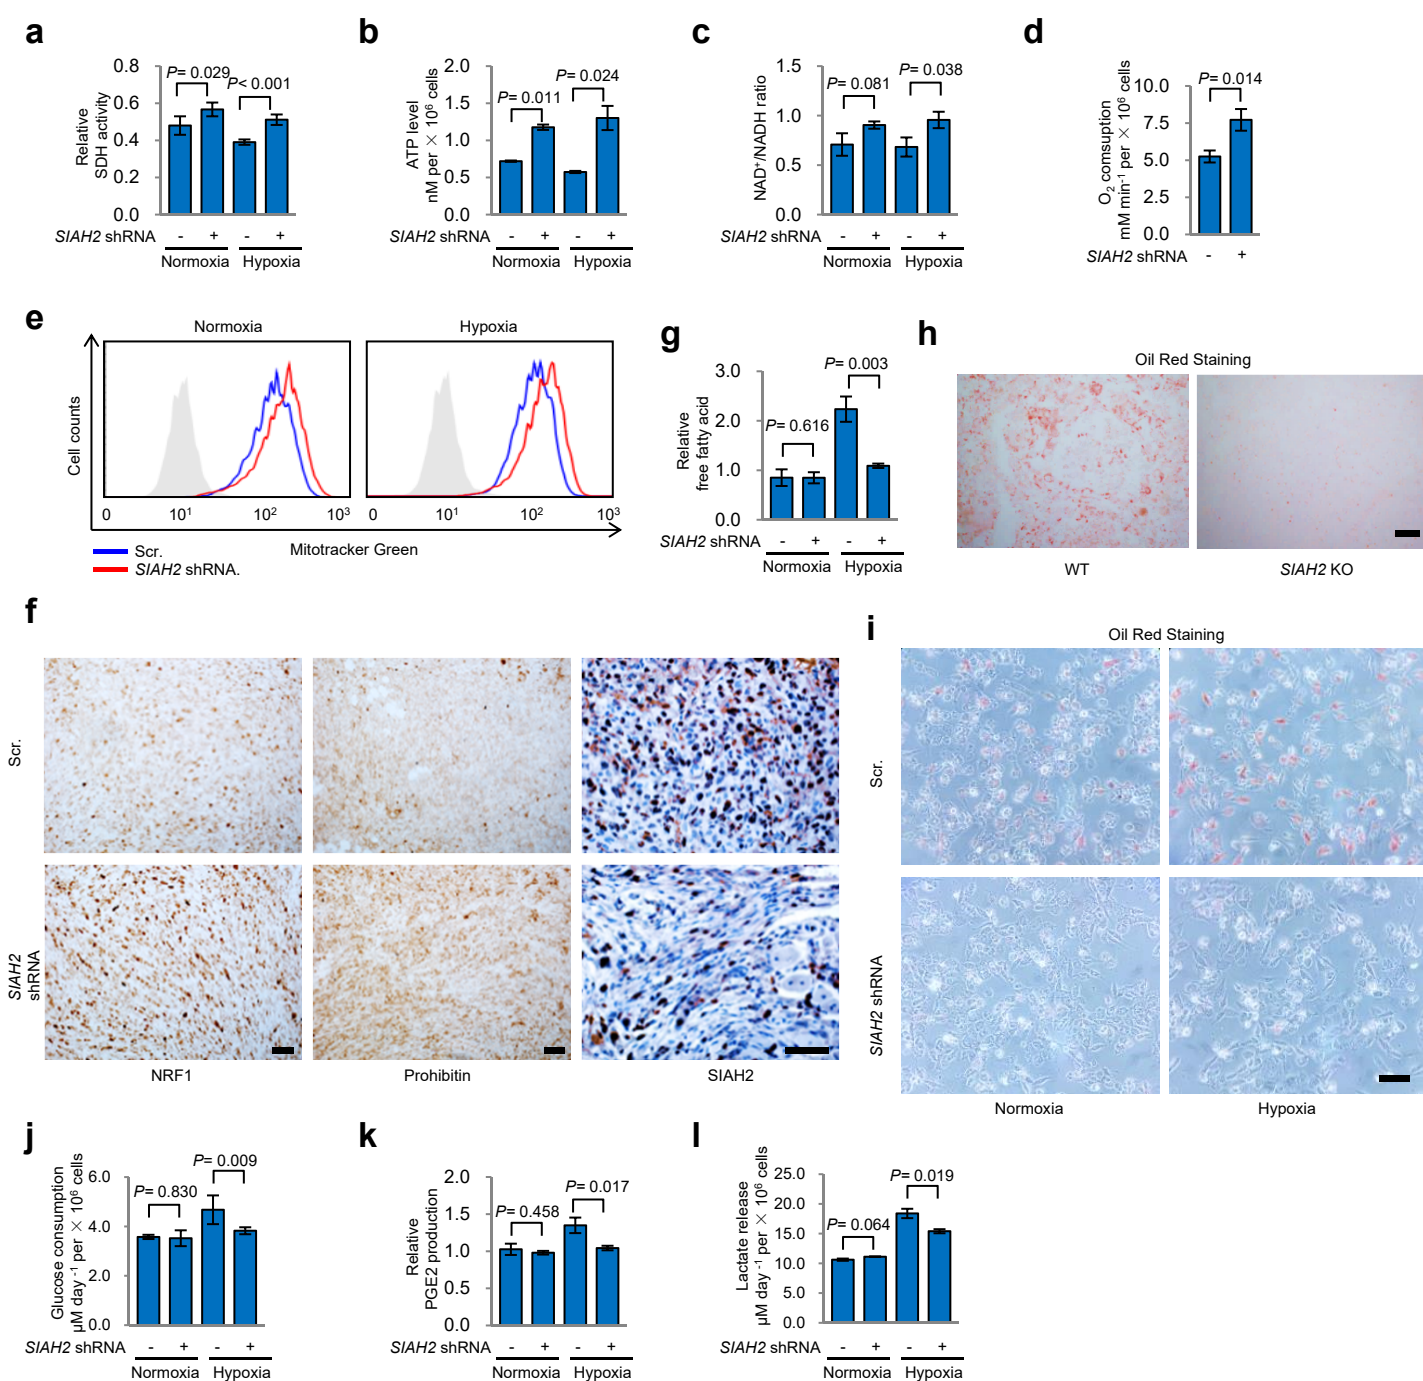

**Supplementary Figure 6** SIAH2 facilitates hypoxia-induced metabolic reprogramming. (a-c) Wild-type and SIAH2-knockdown MDA-MB-231 cells were cultured under normoxia or hypoxia for 36 h, and then mitochondrial SDH activity (a), ATP levels (b) and NAD<sup>+</sup>/NADH ratios (c) were analyzed. (d) Oxygen consumption rate was determined in wild-type and SIAH2-knockdown MDA-MB-231 cells. (e) Wild-type and SIAH2-knockdown MDA-MB-231 cells were cultured under normoxia or hypoxia for 36 h, cells were stained with 100 nM MitoTracker Green and analyzed with flow cytometry. (f) The indicated xenograft tumor tissues were immunohistochemically analyzed by staining with the indicated antibodies. Scale bars, 50 μm. (g) Wild-type and SIAH2-knockdown MDA-MB-231 cells were cultured under normoxia or hypoxia for 36 h, then the concentrations of free fatty acids were analyzed. (h) Wild-type and SIAH2<sup>-/-</sup> xenograft tissues were stained by Oil Red. Scale bars, 50 μm. (i) Wild-type and SIAH2-knockdown MDA-MB-231 cells were treated with 0.5 mM palmitic acid and cultured under normoxia or hypoxia for 24 h. Cells were stained by Oil Red. Scale bars, 100 μm. (j-l) Wild-type and SIAH2-knockdown MDA-MB-231 cells were cultured under normoxia or hypoxia for 36 h, then concentrations of glucose (j), prostaglandin E<sub>2</sub> (PGE<sub>2</sub>) (k) and lactate (l) were analyzed. For all panels, error bars indicate s.d.. For panel (a-d), (g) and (j-l), n = 3 biological replicates, average of n=5 technical replicates for each biological replicate was used. The two-tailed unpaired student t-test was used.

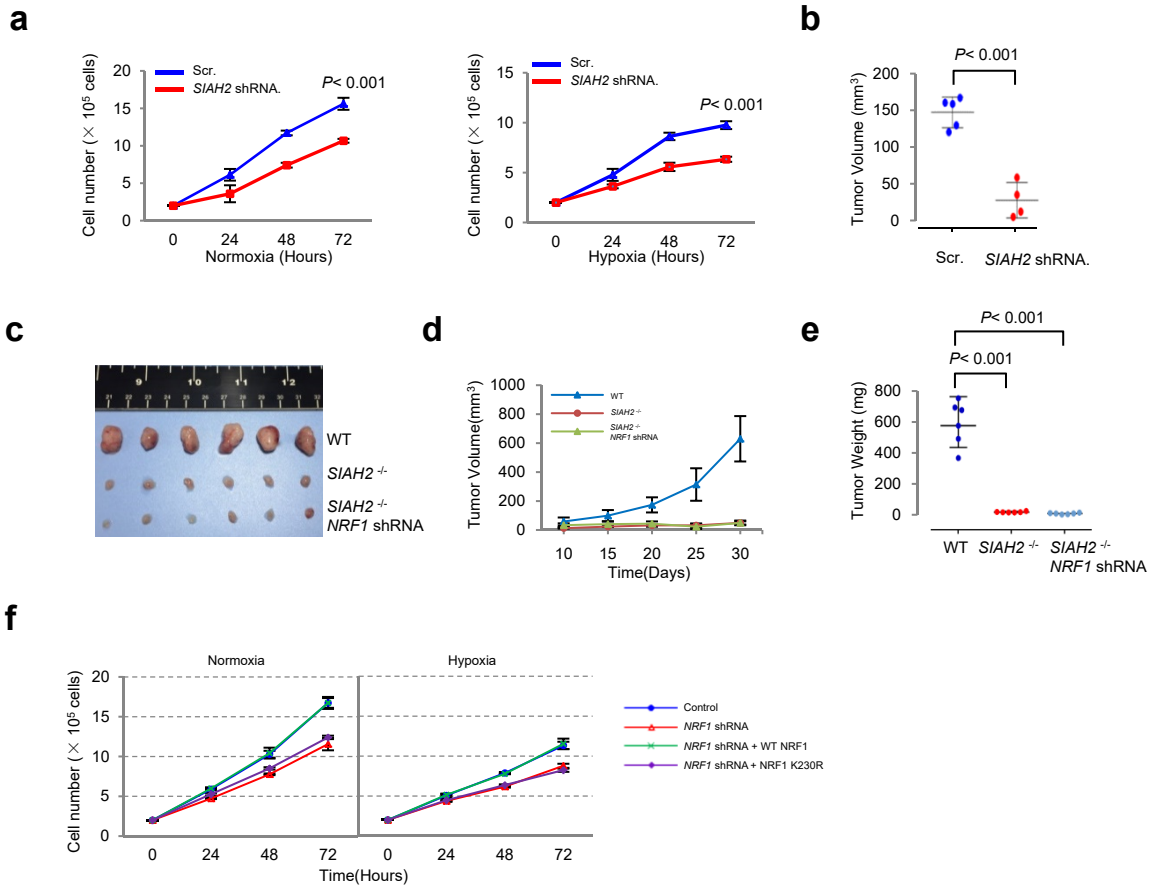

**Supplementary Figure 7** SIAH2-NRF1 axis regulates tumor growth and cell proliferation. (a) Growth curves of wild-type and SIAH2-knockdown MDA-MB-231 cells cultured under normoxia and hypoxia. (b) Volumes of wild-type and SIAH2-knockdown xenograft tumors. (c-e) Images (c), growth curves (d) and weights (e) of xenograft tumors derived from MDA-MB-231 cells with the indicated modifications. Tumors were established in mice by subcutaneous injection of cells. (f) Stable NRF1-knockdown MDA-MB-231 cells reconstituted with wild-type NRF1 or the NRF1-K230R mutant, together with mock and NRF1-knockdown MDA-MB-231 cells, were cultured under normoxia or hypoxia, cell numbers were calculated at the indicated time points. For all panels, error bars indicate s.d.. For panel (a) and (f)  $n = 3$  biological replicates, average of  $n=5$  technical replicates for each biological replicate was used. For panel (b),  $n = 5$  mice per group. For panel (c-e),  $n = 6$  mice per group. The two-tailed unpaired student t-test was used.



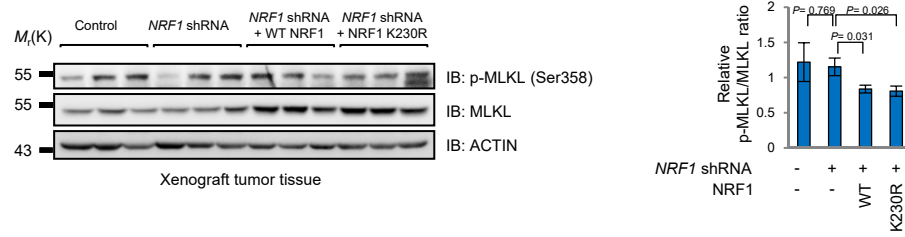

**Supplementary Figure 8** NRF1-K230R-induced tissue damage is not due to MLKL-mediated necroptosis. Three groups of fresh frozen tissues from indicated xenograft tumors were analyzed by western blotting with the anti-p-MLKL (Ser358) and anti-MLKL antibodies. Quantification of the ratio of p-MLKL versus to total MLKL protein levels was shown below.  $n = 3$  biological replicates. The two-tailed unpaired student t-test was used to compare data.

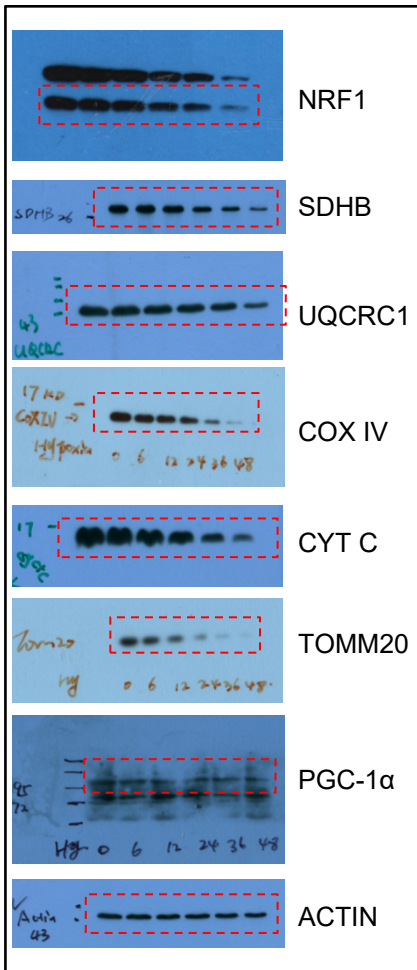

Figure 2a

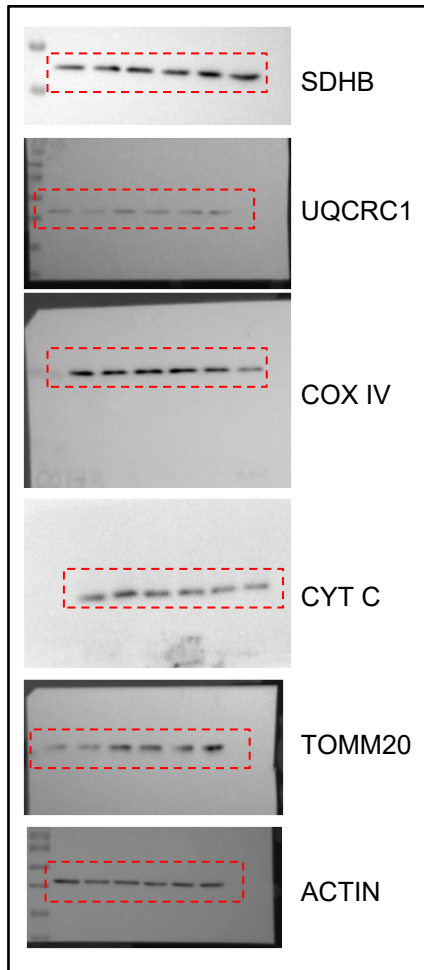

Figure 2c

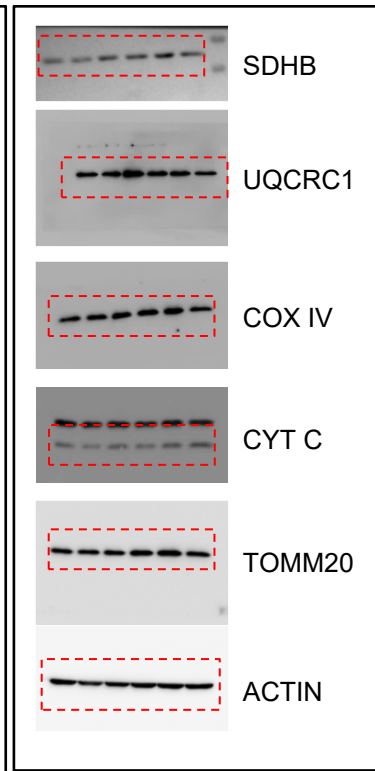

Figure 2d

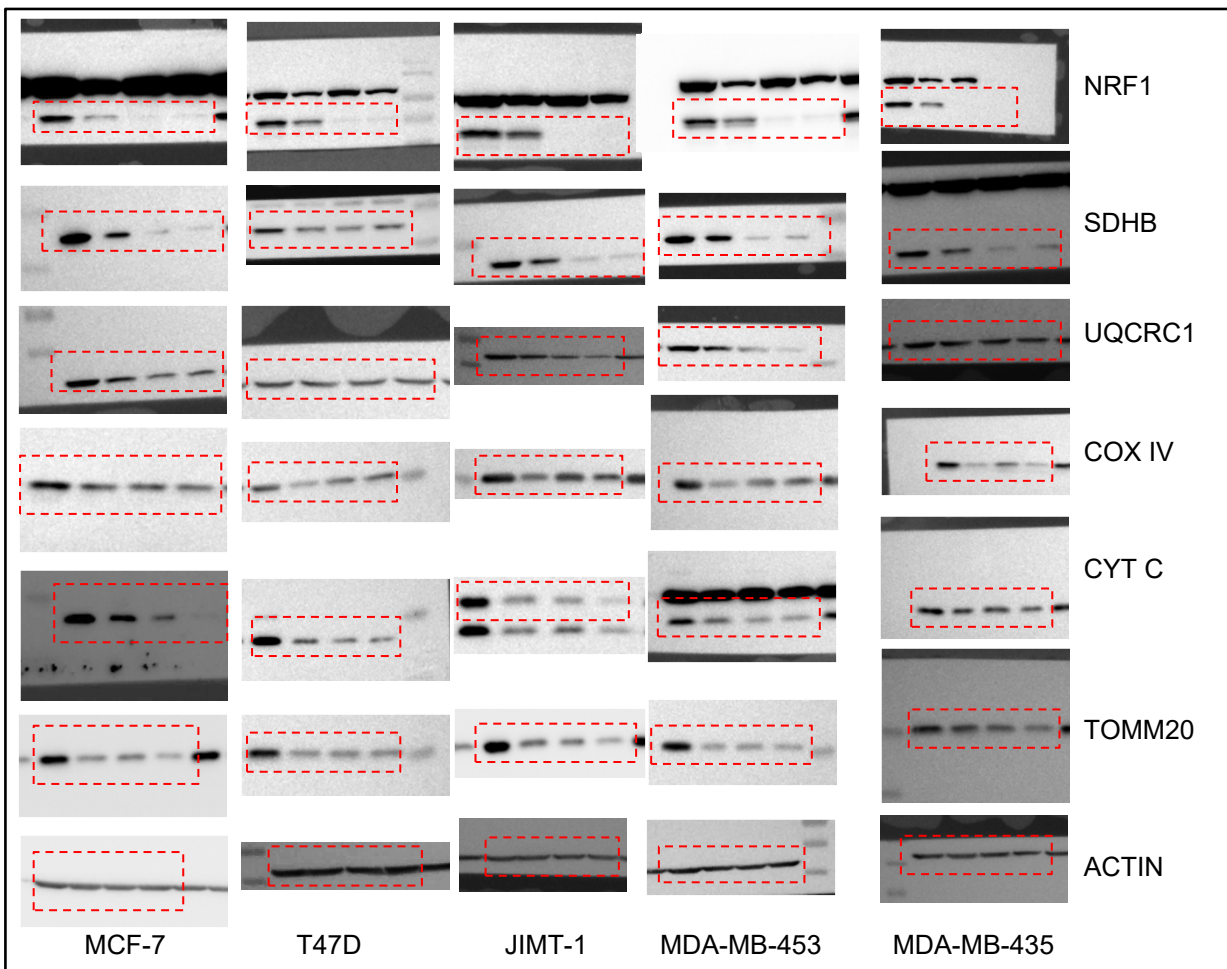

Figure 2e

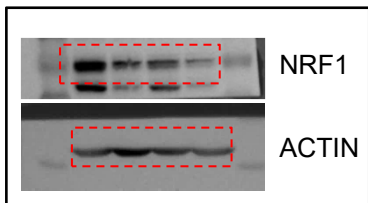

Figure 3a

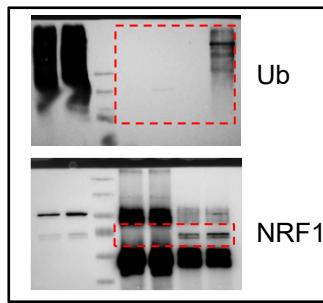

Figure 3b

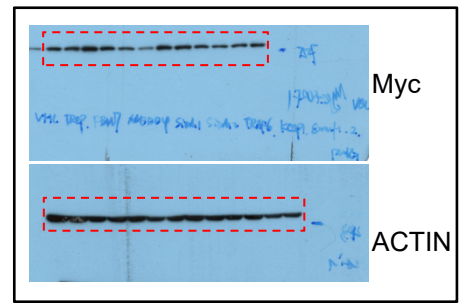

Figure 3c

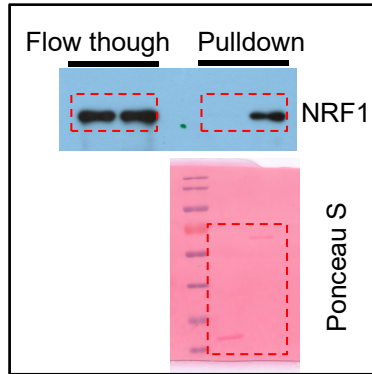

Figure 3d

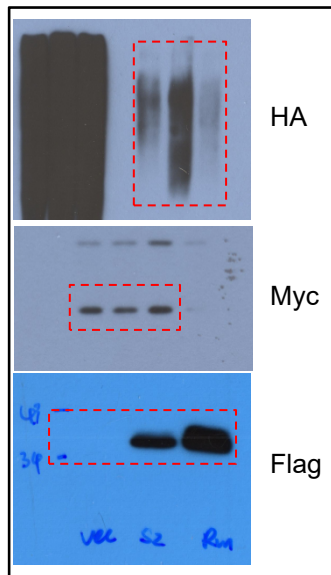

Figure 3e

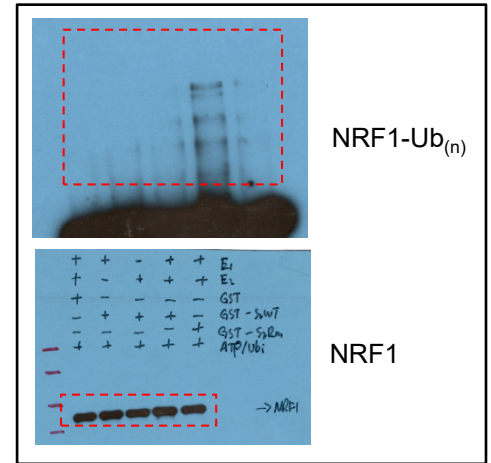

Figure 3f

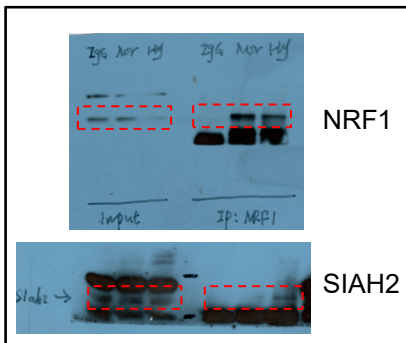

Figure 3g

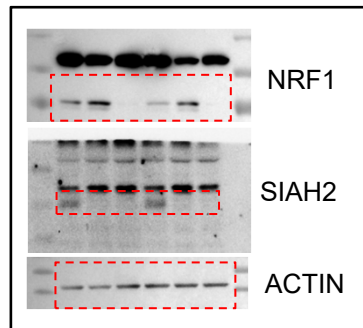

Figure 3h

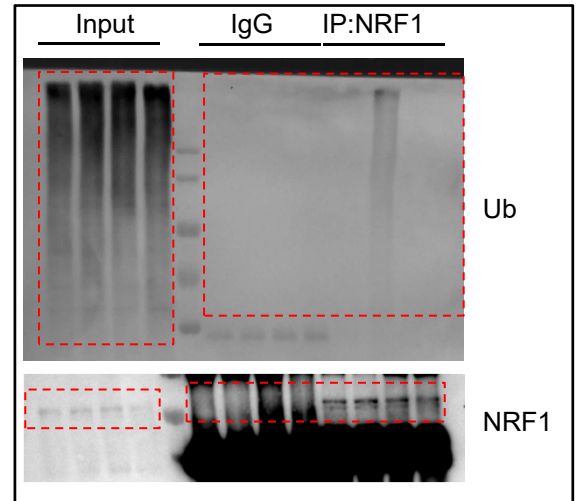

Figure 3i

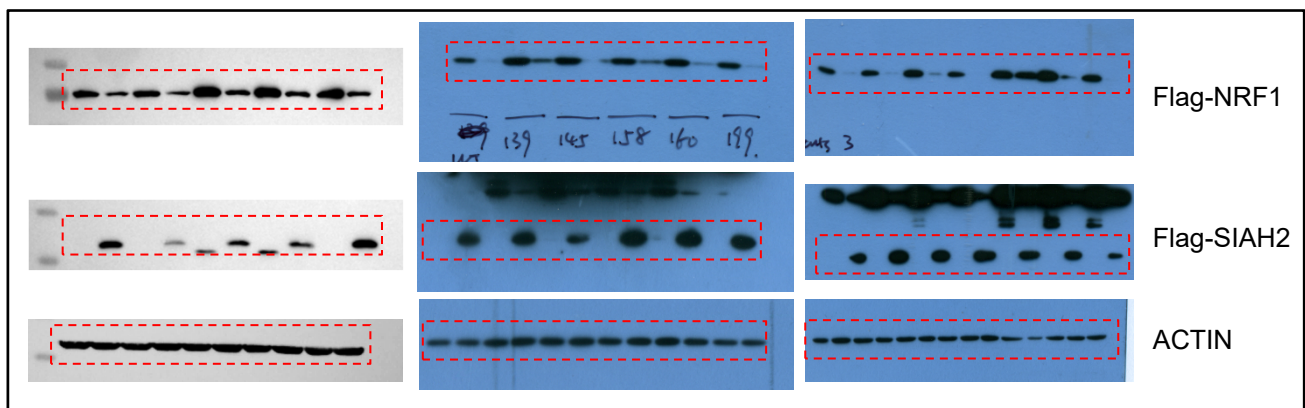

Figure 4a

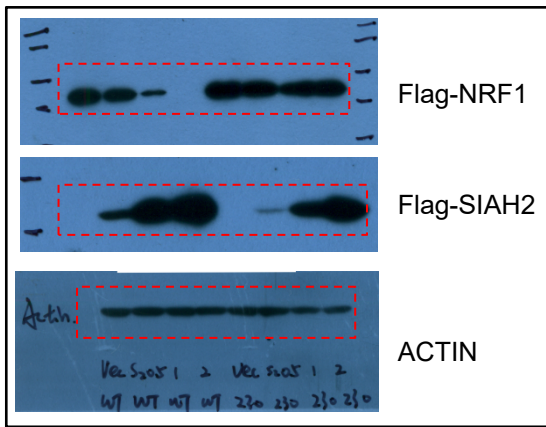

Figure 4b

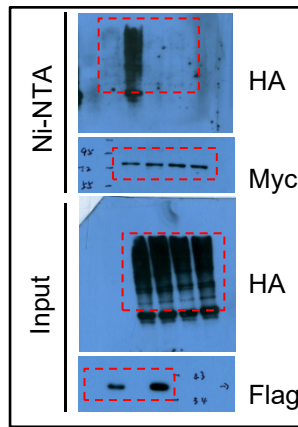

Figure 4c

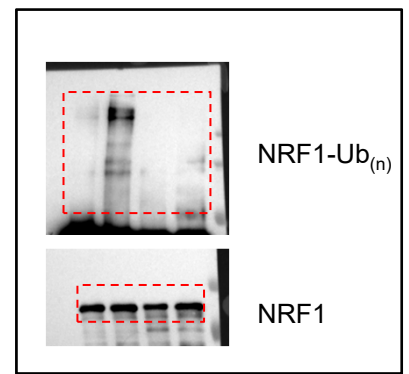

Figure 4d

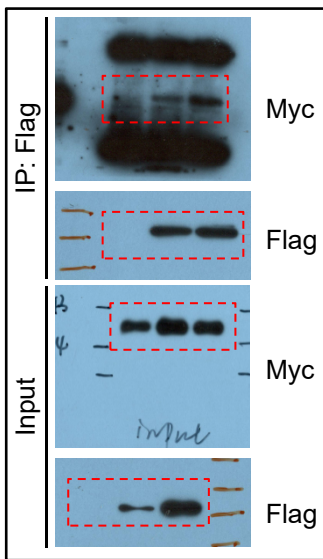

Figure 4e

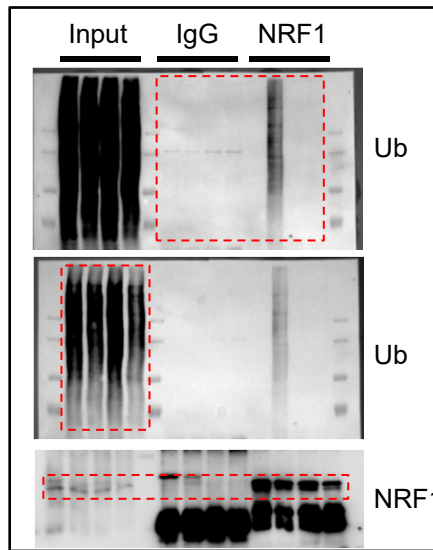

Figure 4f

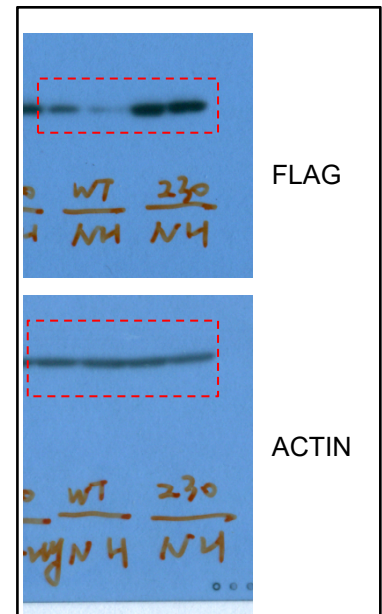

Figure 4g

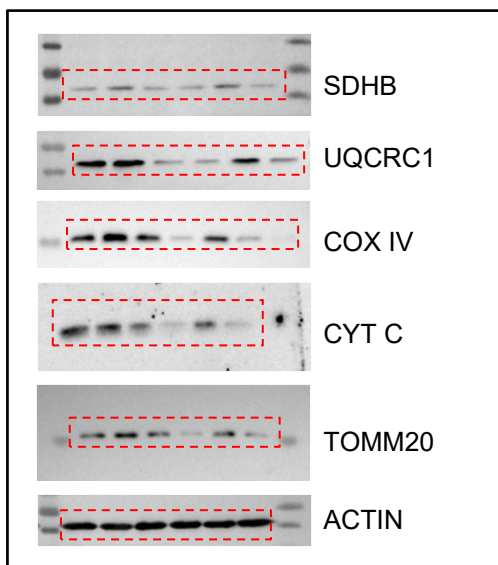

Figure 5a

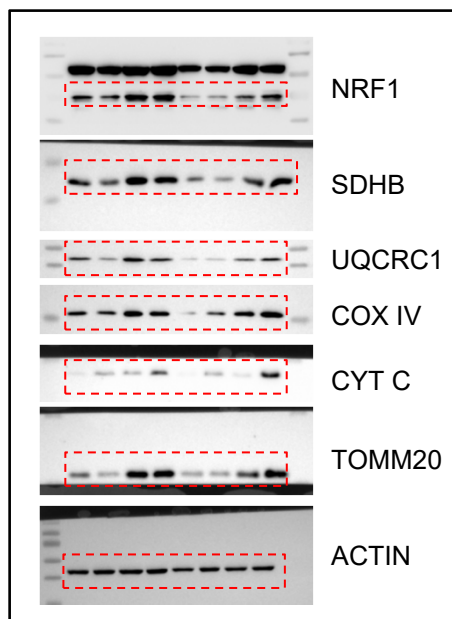

Figure 5c

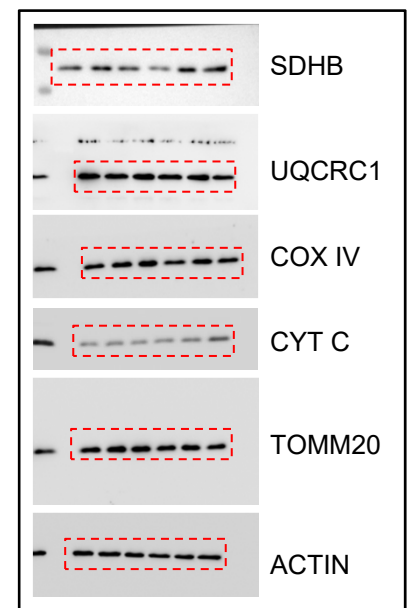

Figure 5e

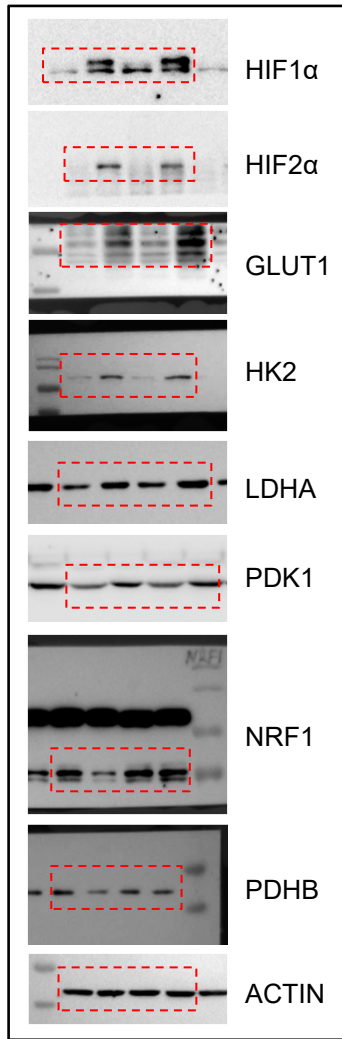

Figure 6k

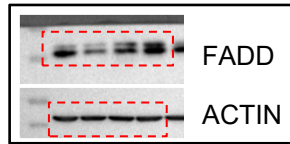

Figure 8g

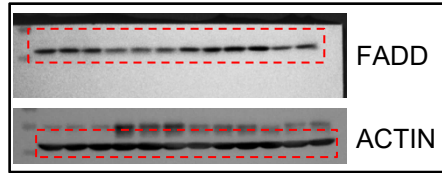

Figure 8h

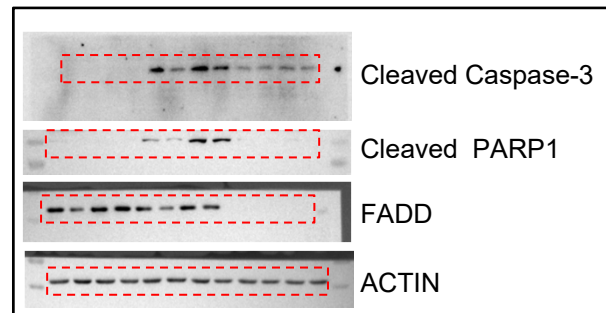

Figure 8i

**Supplementary Figure 9** Uncropped images of key blots.

Supplementary Table 1 Prohibitin is reduced in breast cancer

| IHC criteria         |       |  |  |  |
|----------------------|-------|-----------------------------------------------------------------------------------|------------------------------------------------------------------------------------|-------------------------------------------------------------------------------------|
| Prohibitin Staining  | Total | +                                                                                 | ++                                                                                 | +++                                                                                 |
| Normal breast tissue | 27    | 6 (22.2%)                                                                         | 14 (51.9%)                                                                         | 7 (25.9%)                                                                           |
| Breast tumor tissue  | 158   | 75 (47.5%)                                                                        | 67 (42.4%)                                                                         | 16 (10.1%)                                                                          |

*P* = 0.015

Supplementary Table 1 Prohibitin is reduced in breast cancer. Scale bars, 200  $\mu$ m. Brown color indicates positive immune reaction. Statistical significance was determined by  $\chi^2$  test.

Supplementary Table 2 Patient characteristics based on Prohibitin expression

| Variables                        | Total | Prohibitin Staining Intensity |            |            | P-value |
|----------------------------------|-------|-------------------------------|------------|------------|---------|
|                                  |       | +                             | ++         | +++        |         |
| Age                              |       |                               |            |            | 0.965   |
| >50 years                        | 67    | 31 (46.3%)                    | 29 (43.3%) | 7 (10.4%)  |         |
| ≤ 50 years                       | 91    | 44 (48.4%)                    | 38 (41.7%) | 9 (9.90%)  |         |
| Types                            |       |                               |            |            | 0.036   |
| invasive ductal carcinoma (IDC)  | 79    | 31 (39.2%)                    | 36 (45.6%) | 12 (15.2%) |         |
| invasive lobular carcinoma (ILC) | 79    | 44 (55.7%)                    | 31 (39.2%) | 4 (5.10%)  |         |
| T Stage                          |       |                               |            |            | 0.002   |
| T1                               | 11    | 2 (18.2%)                     | 5 (45.4%)  | 4 (36.4%)  |         |
| T2                               | 112   | 48 (42.9%)                    | 52 (46.4%) | 12 (10.7%) |         |
| T3                               | 17    | 11 (64.7%)                    | 6 (35.3%)  | 0 (0.00%)  |         |
| T4                               | 18    | 14 (78.8%)                    | 4 (22.2%)  | 0 (0.00%)  |         |
| AJCC stage                       |       |                               |            |            | 0.025   |
| I/IIa                            | 73    | 27 (37.0%)                    | 35 (47.9%) | 11 (15.1%) |         |
| IIb/III                          | 85    | 48 (56.5%)                    | 32 (37.6%) | 5 (5.90%)  |         |
| Lymph node metastasis            |       |                               |            |            | 0.848   |
| N0                               | 92    | 42 (45.7%)                    | 40 (43.5%) | 10 (10.9%) |         |
| N1/2                             | 66    | 33 (50.0%)                    | 27 (40.9%) | 6 (9.10%)  |         |
| ER positivity                    |       |                               |            |            | 0.570   |
| negative                         | 76    | 40 (52.6%)                    | 29 (38.2%) | 7 (9.20%)  |         |
| 1+                               | 34    | 14 (41.2%)                    | 18 (52.9%) | 2 (5.90%)  |         |
| 2+                               | 28    | 14 (50.0%)                    | 10 (35.7%) | 4 (14.3%)  |         |
| 3+                               | 20    | 7 (35.0%)                     | 10 (50.0%) | 3 (15.0%)  |         |
| HER2 positivity                  |       |                               |            |            | 0.006   |
| negative                         | 121   | 62 (51.2%)                    | 49 (40.5%) | 10 (8.30%) |         |
| 1+                               | 14    | 6 (42.9%)                     | 8 (57.1%)  | 0 (0.00%)  |         |
| 2+                               | 15    | 6 (40.0%)                     | 7 (46.7%)  | 2 (13.3%)  |         |
| 3+                               | 8     | 1 (12.5%)                     | 3 (37.5%)  | 4 (50.0%)  |         |
| PR positivity                    |       |                               |            |            | 0.118   |
| negative                         | 91    | 51 (56.0%)                    | 32 (35.2%) | 8 (8.80%)  |         |
| 1+                               | 30    | 10 (33.3%)                    | 18 (60.0%) | 2 (6.70%)  |         |
| 2+                               | 30    | 12 (40.0%)                    | 14 (46.7%) | 4 (13.3%)  |         |
| 3+                               | 7     | 2 (28.6%)                     | 3 (42.8%)  | 2 (28.6%)  |         |
| triple negative                  |       |                               |            |            | 0.171   |
| Yes                              | 48    | 28 (58.3%)                    | 17 (35.4%) | 3 (6.30%)  |         |
| No                               | 110   | 47 (42.7%)                    | 50 (45.5%) | 13 (11.8%) |         |

Supplementary Table 3 SIAH2 is increased in breast cancer

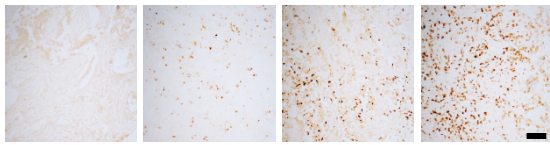

| SIAH2 expression     | Negative    | +          | ++         | +++        | Total |
|----------------------|-------------|------------|------------|------------|-------|
|                      | Low         |            | Moderate   | high       |       |
| Normal breast tissue | 16 (59.3%)  | 8 (29.6%)  | 3 (11.1%)  | 0 (0%)     | 27    |
| Total                | 24 (88.9%)  |            | 3 (11.1%)  | 0 (0%)     |       |
| Breast Tumor         | 41 (25.6%)  | 61 (38.1%) | 39 (24.4%) | 19 (11.9%) | 160   |
| Total                | 102 (63.8%) |            | 39 (24.4%) | 19 (11.9%) |       |

$P=0.003$

Supplementary Table 3 SIAH2 is increased in breast cancer. Scale bars, 100  $\mu$ m. Brown color indicates positive immune reaction. Statistical significance was determined by  $\chi^2$  test.



Supplementary Table 4 NRF1 is reduced in breast cancer

| IHC criteria         | 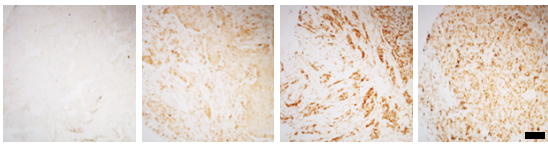 |            |            |            | Total |
|----------------------|------------------------------------------------------------------------------------|------------|------------|------------|-------|
|                      | Negative                                                                           | +          | ++         | +++        |       |
| NRF1 expression      | Low                                                                                |            | Moderate   | high       | Total |
| Normal breast tissue | 0 (0%)                                                                             | 3 (11.1%)  | 14 (51.9%) | 10 (37%)   |       |
| Total                | 3 (11.1%)                                                                          |            | 14 (51.9%) | 10 (37%)   |       |
| Breast Tumor         | 17 (10.6%)                                                                         | 79 (49.4%) | 42 (26.3%) | 22 (13.7%) | 160   |
| Total                | 96 (60.0%)                                                                         |            | 42(26.3%)  | 22 (13.7%) |       |

$P < 0.001$

Supplementary Table 4 NRF1 is reduced in breast cancer. Scale bars, 100  $\mu$ m. Brown color indicates positive immune reaction. Statistical significance was determined by  $\chi^2$  test.

Supplementary Table 5 Patient characteristics based on NRF1 expression

| Variables             | Total | NRF1 expression |            | P-value |
|-----------------------|-------|-----------------|------------|---------|
|                       |       | Negative/+      | ++/+++     |         |
| Age                   |       |                 |            | 0.948   |
| >50 years             | 67    | 40 ( 59.7%)     | 27 (40.3%) |         |
| ≤ 50 years            | 93    | 56 ( 60.2%)     | 37 (39.8%) |         |
| Types                 |       |                 |            | 0.517   |
| IDC                   | 80    | 46 (57.5%)      | 34 (42.5%) |         |
| ILC                   | 80    | 50 (62.5%)      | 30 (37.5%) |         |
| T Stage               |       |                 |            | 0.030   |
| T1/T2                 | 125   | 69 (55.2%)      | 56 (44.8%) |         |
| T3/T4                 | 35    | 26 (74.3%)      | 9 (25.7%)  |         |
| AJCC stage            |       |                 |            | 0.271   |
| I/IIa                 | 74    | 41 (55.4%)      | 33 (44.6%) |         |
| IIb/III               | 86    | 55 (64.0%)      | 31 (36.0%) |         |
| Lymph node metastasis |       |                 |            | 0.948   |
| N0                    | 93    | 56 (60.2%)      | 37 (39.8%) |         |
| N1/2                  | 67    | 40 (59.7%)      | 27 (40.3%) |         |
